# Supplementary material for: Tuning valence tautomerism in a family of dinuclear cobalt complexes incorporating a conjugated bridging bis(dioxolene) ligand with weak communication
Source: Royal Society of Chemistry journal article supplement (doi:10.1039/d3dt04162j), 2024-01-01
Supplement: d3dt04162j1.pdf [file d3dt04162j1.pdf]

*Supporting Information to accompany*

**Tuning Valence Tautomerism in a Family of Dinuclear Cobalt Complexes  
Incorporating a Conjugated Bridging Bis(dioxolene) Ligand with Weak  
Communication**

Tristan E. Fischer, Jett T. Janetzki, F. Zahra M. Zahir, Robert W. Gable, Alyona A. Starikova and  
Colette Boskovic\*

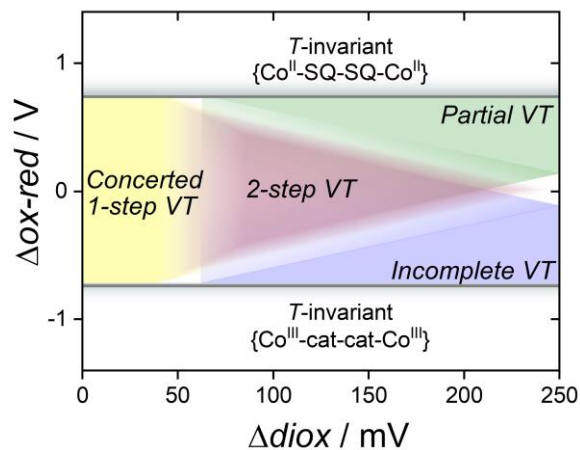

**Fig S1** Correlation between redox parameters and VT transition profile for dinuclear cobalt complexes bridged by a bis(dioxolene) ligand established by Gransbury, Boskovic *et. al.*<sup>1</sup> Figure adapted with permission from G. K. Gransbury, B. N. Livesay, J. T. Janetzki, M. A. Hay, R. W. Gable, M. P. Shores, A. Starikova and C. Boskovic, *J. Am. Chem. Soc.*, 2020, **142**, 10692–10704. Copyright 2020 American Chemical Society.

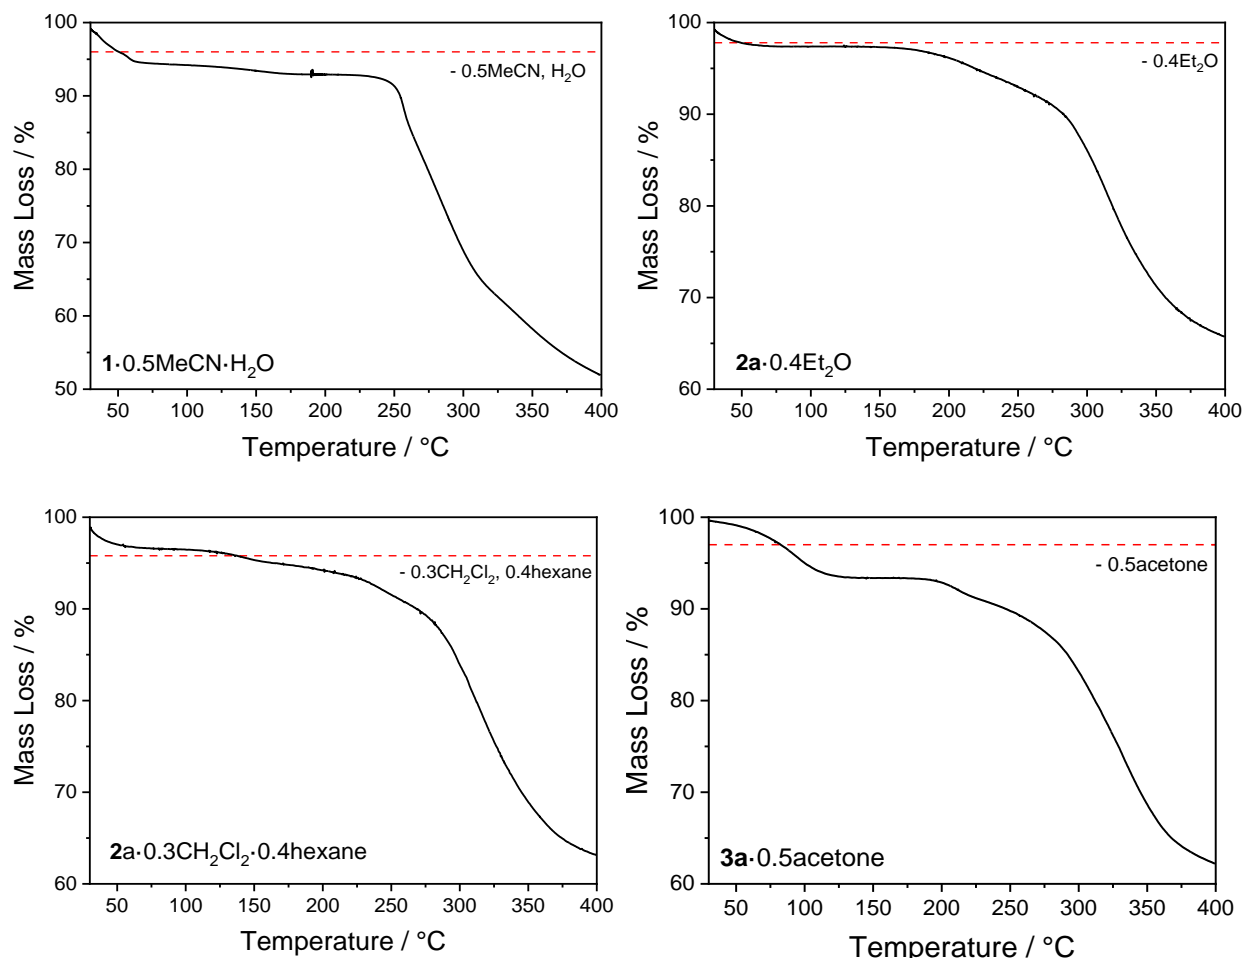

**Fig S2** Thermogravimetric profile for **1a**·0.5MeCN·H<sub>2</sub>O, **2a**·0.4Et<sub>2</sub>O, **2a**·0.3CH<sub>2</sub>Cl<sub>2</sub>·0.4hexane, and **3a**·0.5acetone at a ramp rate of 5 °C min<sup>-1</sup>.

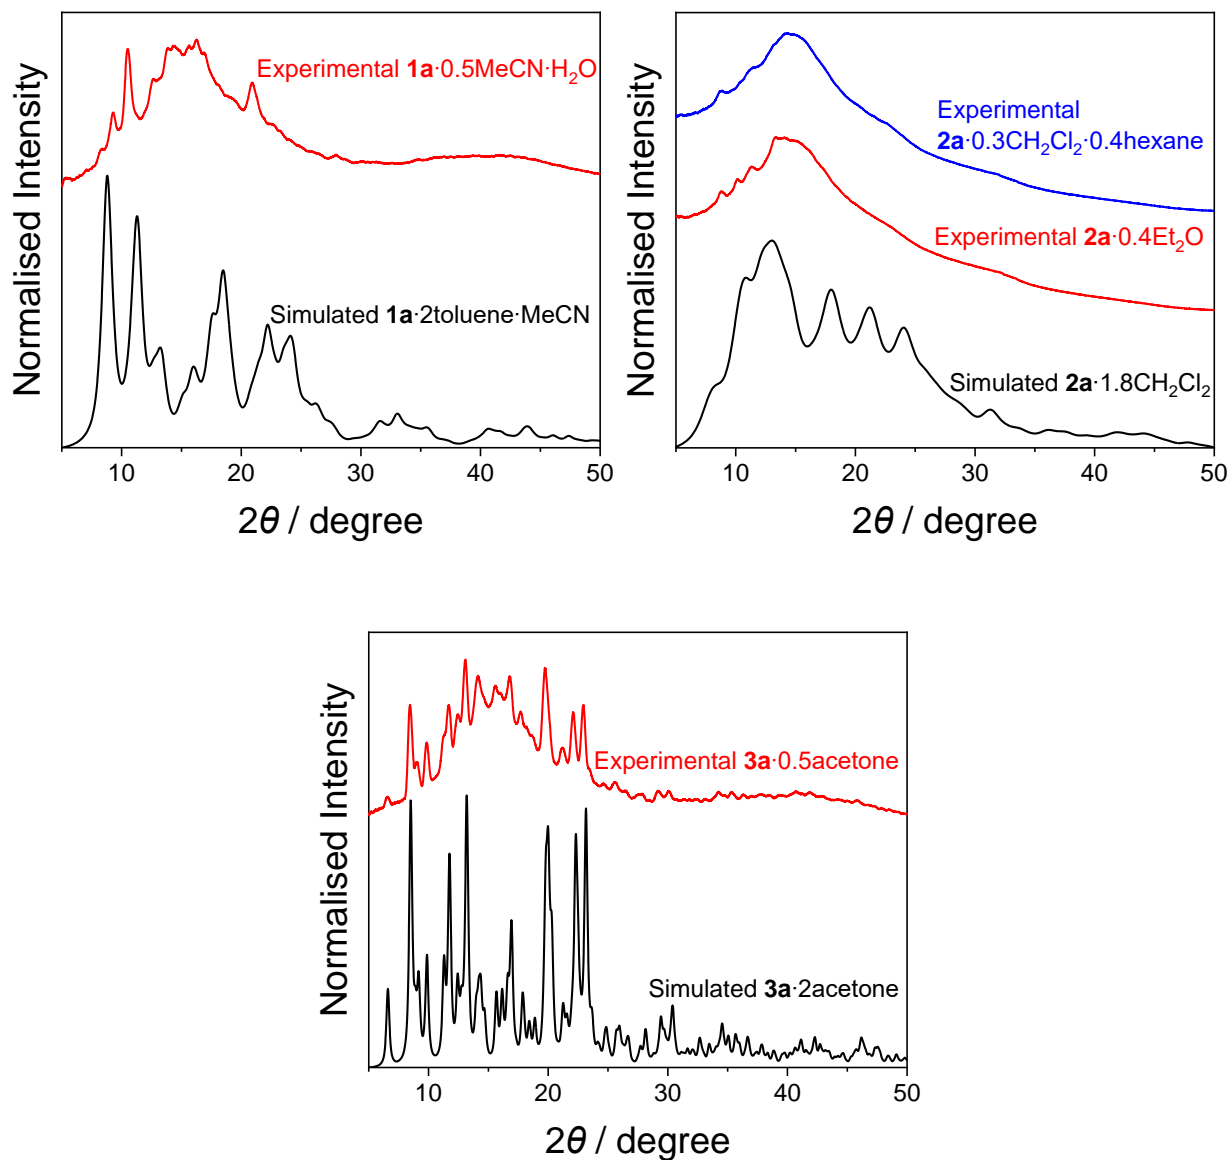

**Fig S3** Top left: Experimental PXRD pattern for **1a**·0.5MeCN·H<sub>2</sub>O and simulated PXRD pattern for **1a**·2toluene·MeCN. Top right: Experimental PXRD pattern for **2a**·0.4Et<sub>2</sub>O and **2a**·0.3CH<sub>2</sub>Cl<sub>2</sub>·0.4hexane, and simulated PXRD pattern for **2a**·1.8CH<sub>2</sub>Cl<sub>2</sub>. Bottom: Experimental PXRD pattern for **3a**·0.5acetone, and simulated PXRD pattern for **3a**·2acetone.

**Table S1** Crystallographic data and structure refinement parameters for compounds **1a**·2toluene·2MeCN, **2a**·1.8CH<sub>2</sub>Cl<sub>2</sub>, and **3a**·2acetone collected at 100 K.

|                                                              | <b>1a</b> ·2toluene·2MeCN                                                                                     | <b>2a</b> ·1.8CH <sub>2</sub> Cl <sub>2</sub>                                                                                       | <b>3a</b> ·2acetone                                                                                           |
|--------------------------------------------------------------|---------------------------------------------------------------------------------------------------------------|-------------------------------------------------------------------------------------------------------------------------------------|---------------------------------------------------------------------------------------------------------------|
| Empirical formula                                            | C <sub>70</sub> H <sub>70</sub> Co <sub>2</sub> F <sub>12</sub> N <sub>12</sub> O <sub>6</sub> P <sub>2</sub> | C <sub>57.8</sub> H <sub>57.6</sub> Cl <sub>3.6</sub> Co <sub>2</sub> F <sub>12</sub> N <sub>10</sub> O <sub>6</sub> P <sub>2</sub> | C <sub>64</sub> H <sub>72</sub> Co <sub>2</sub> F <sub>12</sub> N <sub>10</sub> O <sub>8</sub> P <sub>2</sub> |
| Formula weight                                               | 1583.18                                                                                                       | 1523.76                                                                                                                             | 1517.11                                                                                                       |
| Temperature (K)                                              | 99.0(1)                                                                                                       | 100.0(2)                                                                                                                            | 100.0(2)                                                                                                      |
| Crystal system                                               | triclinic                                                                                                     | monoclinic                                                                                                                          | monoclinic                                                                                                    |
| Space group                                                  | <i>P</i> -1                                                                                                   | <i>P</i> 2 <sub>1</sub> / <i>n</i>                                                                                                  | <i>P</i> 2 <sub>1</sub> / <i>n</i>                                                                            |
| <i>a</i> (Å)                                                 | 8.6957(2)                                                                                                     | 10.813(2)                                                                                                                           | 15.396(3)                                                                                                     |
| <i>b</i> (Å)                                                 | 10.8984(2)                                                                                                    | 13.371(3)                                                                                                                           | 13.874(3)                                                                                                     |
| <i>c</i> (Å)                                                 | 20.7669(4)                                                                                                    | 22.478(5)                                                                                                                           | 16.953(3)                                                                                                     |
| $\alpha$ (°)                                                 | 93.436(2)                                                                                                     | 90                                                                                                                                  | 90                                                                                                            |
| $\beta$ (°)                                                  | 101.986(2)                                                                                                    | 103.68(3)                                                                                                                           | 112.52(3)                                                                                                     |
| $\gamma$ (°)                                                 | 111.088(2)                                                                                                    | 90                                                                                                                                  | 90                                                                                                            |
| Volume (Å <sup>3</sup> )                                     | 1776.57(7)                                                                                                    | 3157.7(12)                                                                                                                          | 3345.1(13)                                                                                                    |
| <i>Z</i>                                                     | 1                                                                                                             | 2                                                                                                                                   | 2                                                                                                             |
| $\rho_{\text{calc}}$ (g/cm <sup>3</sup> )                    | 1.480                                                                                                         | 1.603                                                                                                                               | 1.506                                                                                                         |
| $\mu$ (mm <sup>-1</sup> )                                    | 4.884                                                                                                         | 0.823                                                                                                                               | 0.639                                                                                                         |
| <i>F</i> (000)                                               | 814.0                                                                                                         | 1551.0                                                                                                                              | 1564.0                                                                                                        |
| Crystal size (mm <sup>3</sup> )                              | 0.276 × 0.158 × 0.047                                                                                         | 0.2 × 0.1 × 0.05                                                                                                                    | 0.2 × 0.17 × 0.15                                                                                             |
| Radiation                                                    | CuK $\alpha$ ( $\lambda$ = 1.54184)                                                                           | Synchrotron ( $\lambda$ = 0.71073)                                                                                                  | Synchrotron ( $\lambda$ = 0.71092)                                                                            |
| 2 $\theta$ range for data collection (°)                     | 8.792 to 150.58                                                                                               | 3.572 to 64.194                                                                                                                     | 3.924 to 55.13                                                                                                |
| Index ranges                                                 | -9 ≤ <i>h</i> ≤ 10, -13 ≤ <i>k</i> ≤ 12, -26 ≤ <i>l</i> ≤ 25                                                  | -16 ≤ <i>h</i> ≤ 16, -19 ≤ <i>k</i> ≤ 19, -30 ≤ <i>l</i> ≤ 30                                                                       | -19 ≤ <i>h</i> ≤ 19, -16 ≤ <i>k</i> ≤ 15, -18 ≤ <i>l</i> ≤ 18                                                 |
| Reflections collected                                        | 30037                                                                                                         | 54041                                                                                                                               | 35587                                                                                                         |
| Independent reflections                                      | 7308 [R <sub>int</sub> = 0.0686, R <sub>sigma</sub> = 0.0526]                                                 | 9238 [R <sub>int</sub> = 0.0910, R <sub>sigma</sub> = 0.0594]                                                                       | 6049 [R <sub>int</sub> = 0.0828, R <sub>sigma</sub> = 0.0494]                                                 |
| Data/restraints/parameters                                   | 7308/0/473                                                                                                    | 9238/329/542                                                                                                                        | 6049/0/449                                                                                                    |
| Goodness-of-fit on <i>F</i> <sup>2</sup>                     | 1.083                                                                                                         | 0.917                                                                                                                               | 1.060                                                                                                         |
| Final <i>R</i> indexes [ <i>I</i> ≥ 2 $\sigma$ ( <i>I</i> )] | R <sub>1</sub> = 0.0732, wR <sub>2</sub> = 0.1970                                                             | R <sub>1</sub> = 0.0893, wR <sub>2</sub> = 0.2356                                                                                   | R <sub>1</sub> = 0.0456, wR <sub>2</sub> = 0.1286                                                             |
| Final <i>R</i> indexes [all data]                            | R <sub>1</sub> = 0.0804, wR <sub>2</sub> = 0.2122                                                             | R <sub>1</sub> = 0.1418, wR <sub>2</sub> = 0.2776                                                                                   | R <sub>1</sub> = 0.0503, wR <sub>2</sub> = 0.1330                                                             |
| Largest diff. peak/hole (e Å <sup>-3</sup> )                 | 0.97/-0.67                                                                                                    | 1.14/-0.38                                                                                                                          | 0.67/-0.56                                                                                                    |

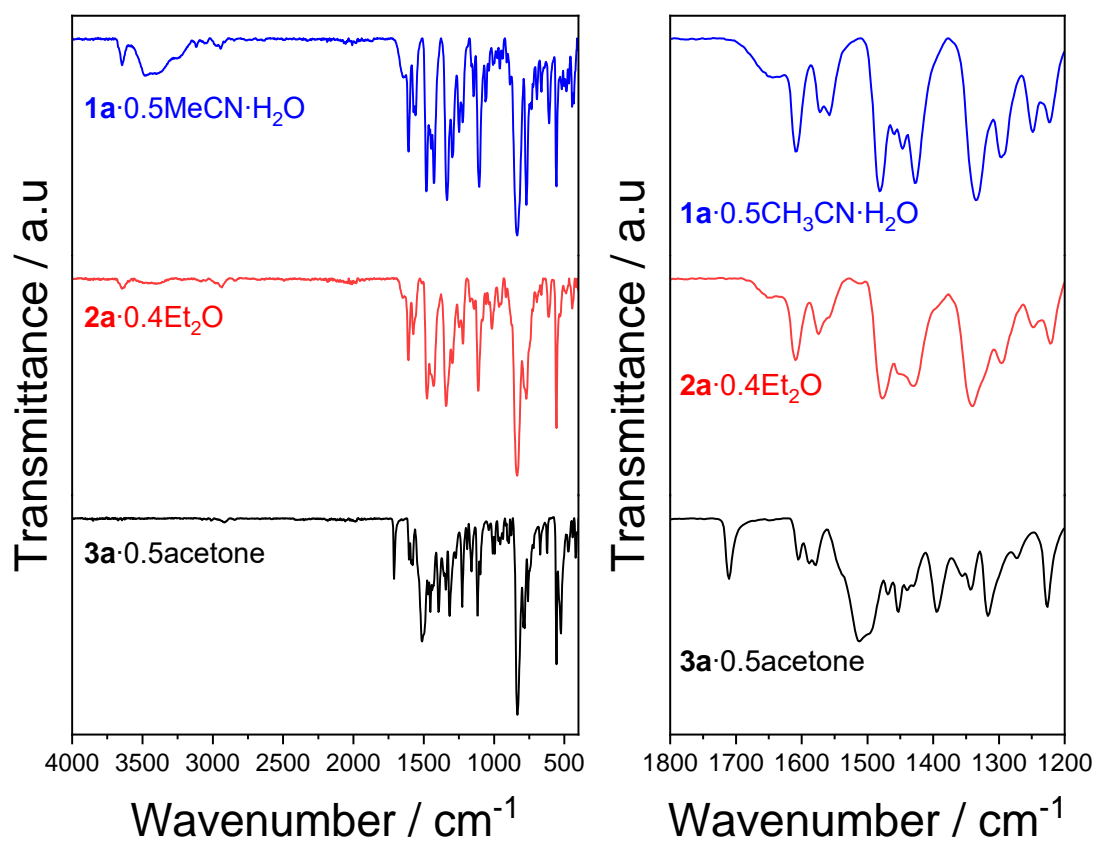

**Fig S4** ATR-IR spectra of **1a**·0.5MeCN·H<sub>2</sub>O, **2a**·0.4Et<sub>2</sub>O and **3a**·0.5acetone in the region 4000 – 400 cm<sup>-1</sup> (left) and 1800 – 1200 cm<sup>-1</sup> (right).

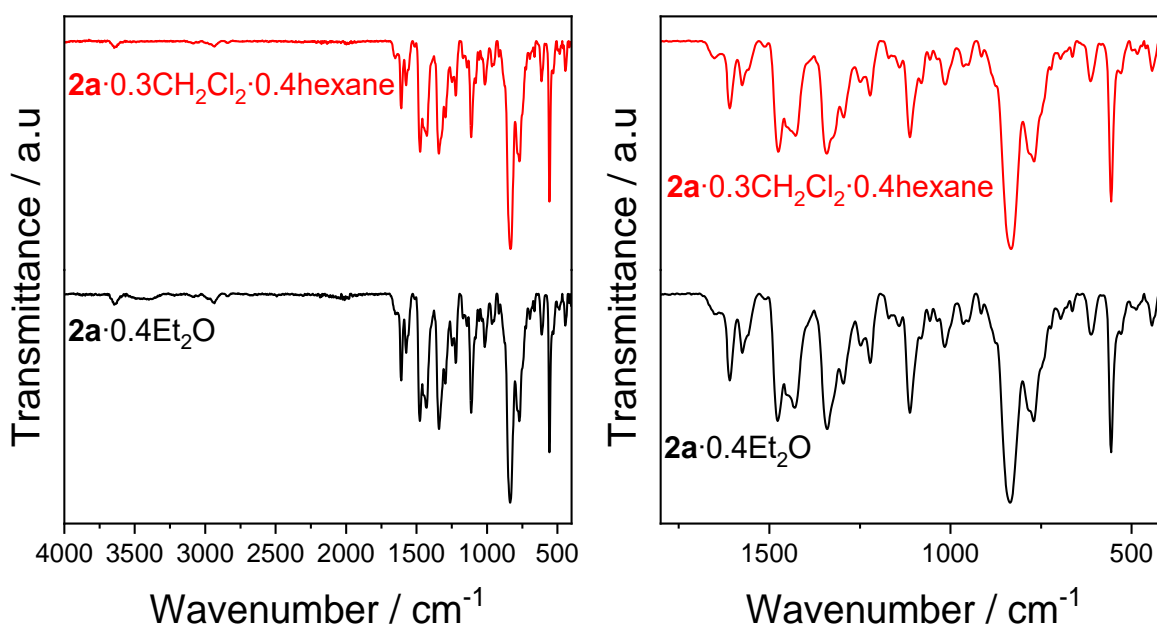

**Fig S5** ATR-IR spectra of **2a**·0.4Et<sub>2</sub>O and **2a**·0.3CH<sub>2</sub>Cl<sub>2</sub>·0.4hexane in the region 4000 – 400 cm<sup>-1</sup> (left) and 1800 – 400 cm<sup>-1</sup> (right).

**Table S2** ATR-IR bands for compounds **1a**·0.5MeCN·H<sub>2</sub>O, **2a**·0.4Et<sub>2</sub>O and **3a**·0.5acetone.

| Assignment                                     | <b>1a</b> | <b>2a</b> | <b>3a</b> |
|------------------------------------------------|-----------|-----------|-----------|
| v(C=C)                                         | 1609 (s)  | 1609 (s)  | 1604 (s)  |
| v(C=C)                                         | 1572 (m)  | 1574 (s)  | 1588 (m)  |
| v(C=N)                                         | 1558 (m)  | 1559 (sh) | 1578 (m)  |
| v(C-O) + δ(C-H)                                | 1447 (s)  | 1441 (sh) | 1512 (m)  |
| v(C-O) + δ(C-H)                                | 1428 (s)  | 1430 (m)  | 1496 (sh) |
| v(C-O/C-C/C=C)                                 | 1335 (s)  | 1339 (s)  | 1317 (m)  |
| Skeletal diox                                  | 1296 (s)  | 1296 (m)  | 1273 (m)  |
| v(C-O/C-C)                                     | 1249 (s)  | 1248 (s)  | 1226 (s)  |
| v(C=O/C=C) + δ(C-H)                            | -         | 1453 (sh) | 1469 (sh) |
| v(P-F) – PF <sub>6</sub> <sup>-</sup>          | 835 (s)   | 835 (s)   | 835 (s)   |
| v(P-F) + δ(P-F) – PF <sub>6</sub> <sup>-</sup> | 556 (s)   | 556 (s)   | 556 (s)   |

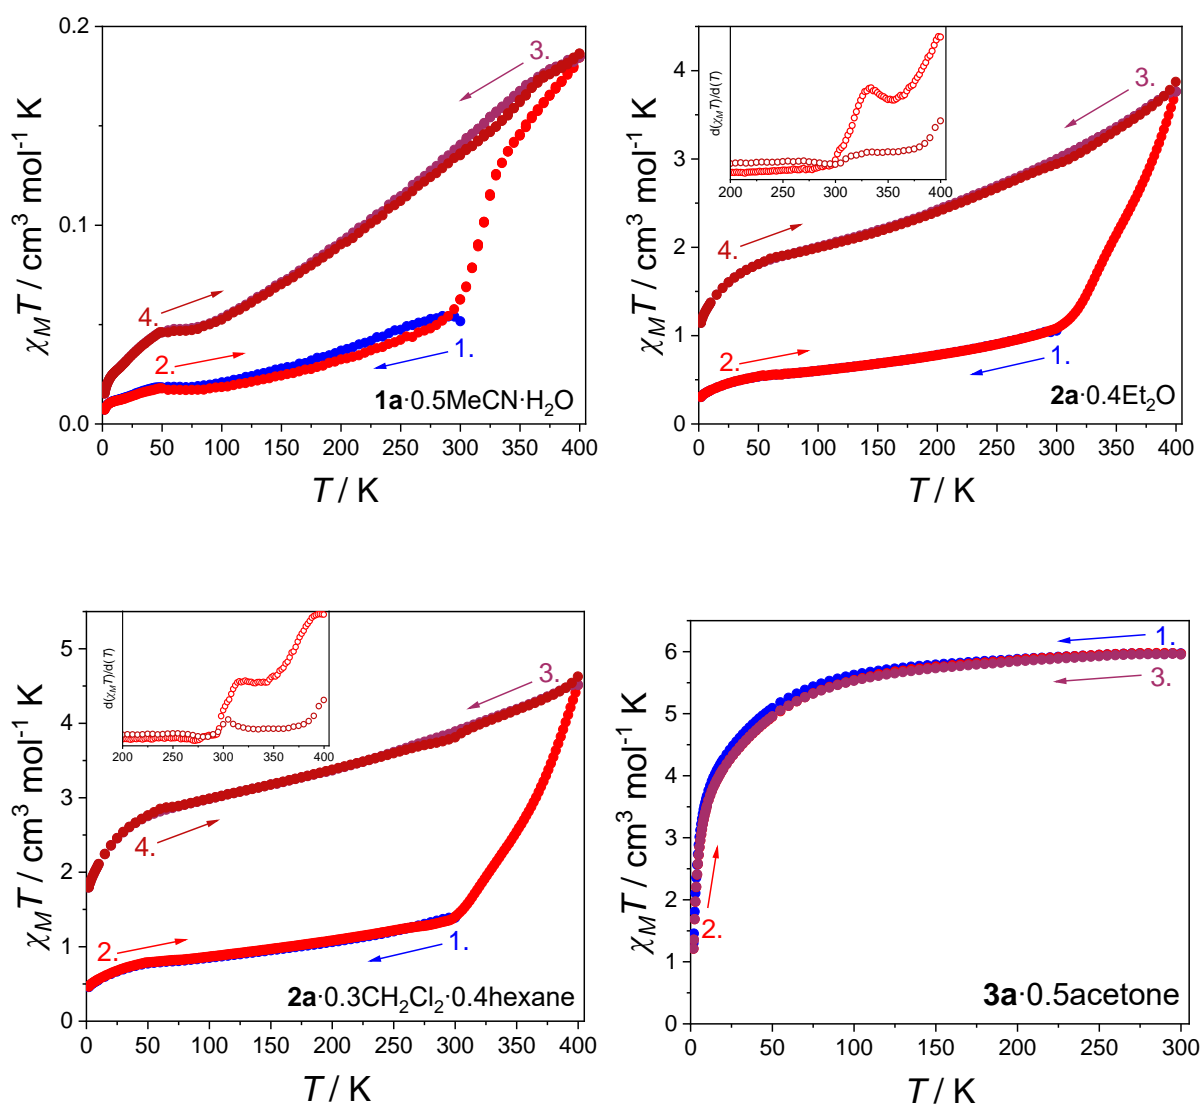

**Fig S6** Plots of  $\chi_M T$  vs  $T$  for **1a**·0.5MeCN·H<sub>2</sub>O, **2a**·0.4Et<sub>2</sub>O, and **2a**·0.3CH<sub>2</sub>Cl<sub>2</sub>·0.4hexane on first cooling 300 – 1.8 K (blue), first heating 1.8 – 400 K (red), second cooling 400 – 1.8 K (purple) and second heating 1.8 – 400 K (dark red). Plot of  $\chi_M T$  vs  $T$  for **3a**·0.5acetone on first cooling (blue), first heating (red) and second cooling (purple). Number arrowed indicates the order and direction of the measurements. Inset for top right and bottom left: first derivative plot  $d(\chi_M T)/d(T)$  for **2a**·0.4Et<sub>2</sub>O (red) **2a**·0.3CH<sub>2</sub>Cl<sub>2</sub>·0.4hexane (blue) upon first heating (red) and second heating (dark red), highlighting the two-step VT behaviour and the plateau temperature.



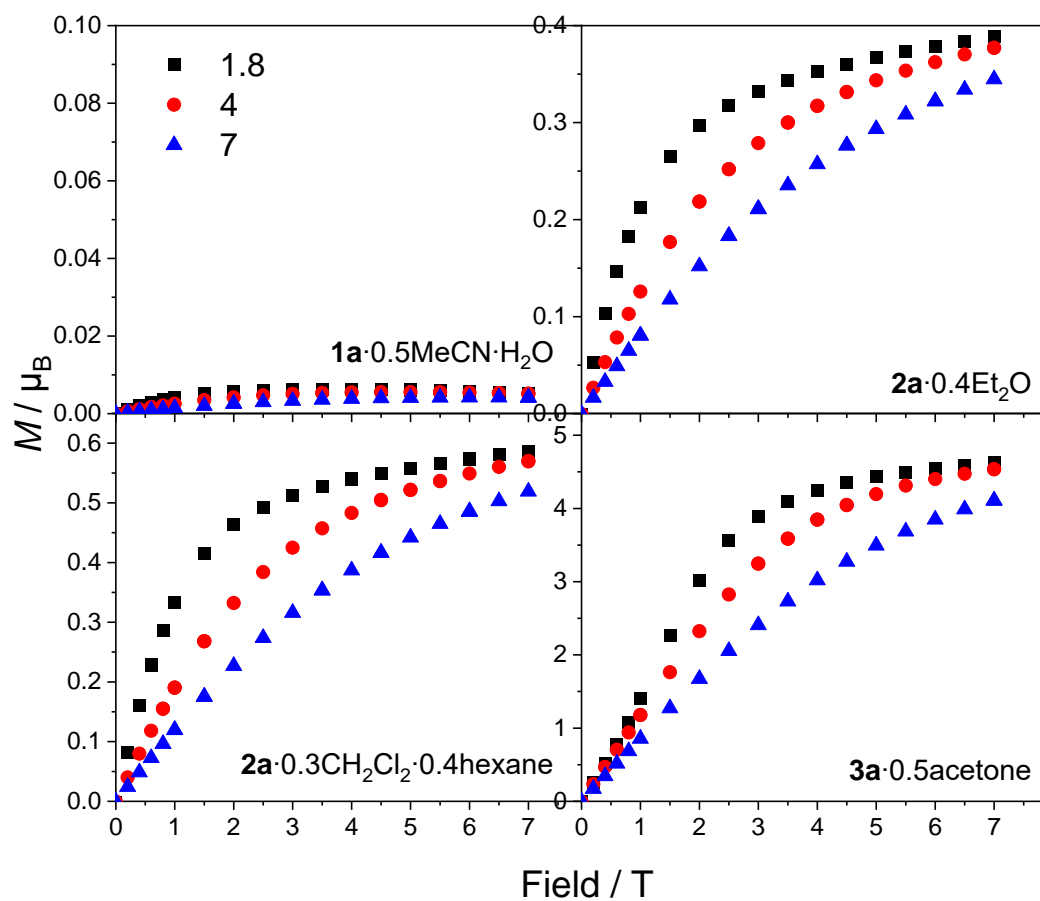

**Fig S7** The field dependence of magnetisation for **1a**·0.5MeCN·H<sub>2</sub>O, **2a**·0.4Et<sub>2</sub>O, and **2a**·0.3CH<sub>2</sub>Cl<sub>2</sub>·0.4hexane and **3a**·0.5acetone at specified temperatures.

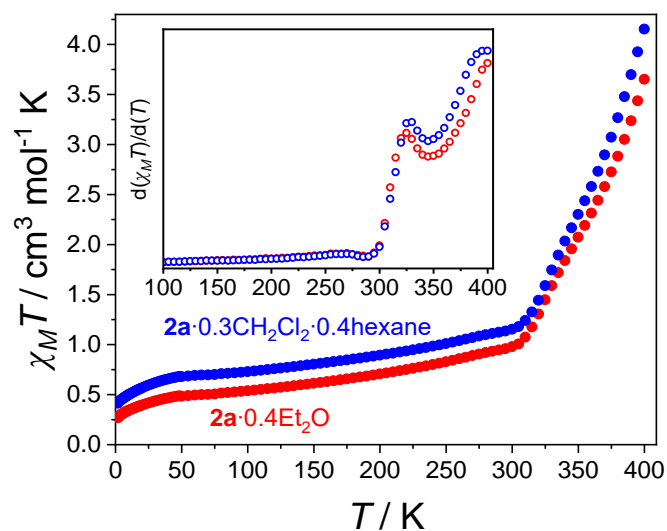

**Fig S8** Plots of  $\chi_M T$  vs  $T$  for **2a**·0.4Et<sub>2</sub>O (red) and **2a**·0.3CH<sub>2</sub>Cl<sub>2</sub>·0.4hexane (blue) on heating 1.8 – 400 K. Inset: first derivative plot  $d(\chi_M T)/d(T)$  for **2a**·0.4Et<sub>2</sub>O (red) **2a**·0.3CH<sub>2</sub>Cl<sub>2</sub>·0.4hexane (blue) highlighting the two-step VT behaviour and the plateau temperature.

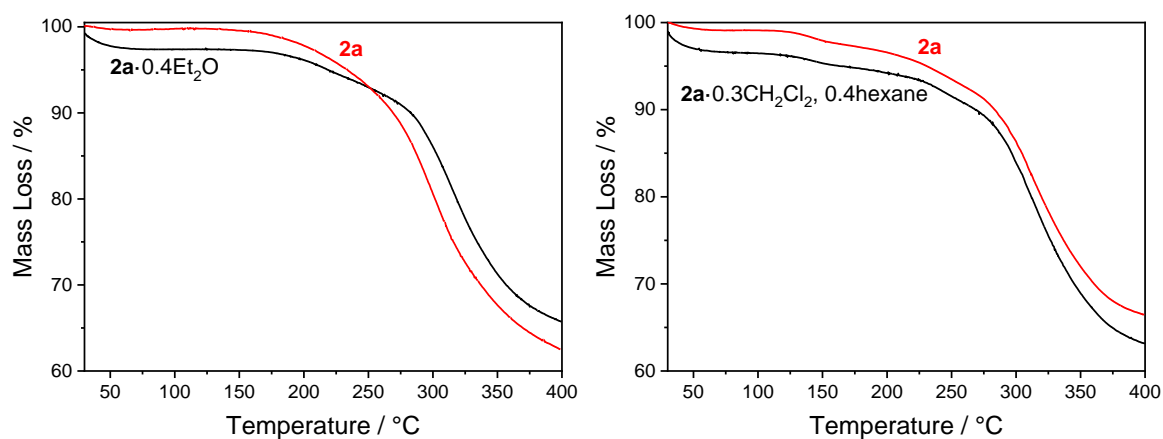

**Fig S9** Thermogravimetric profile for **2a**·0.4Et<sub>2</sub>O and **2a**·0.3CH<sub>2</sub>Cl<sub>2</sub>·0.4hexane before (black) and after (red) desolvation at a ramp rate of 5 °C min<sup>-1</sup>.

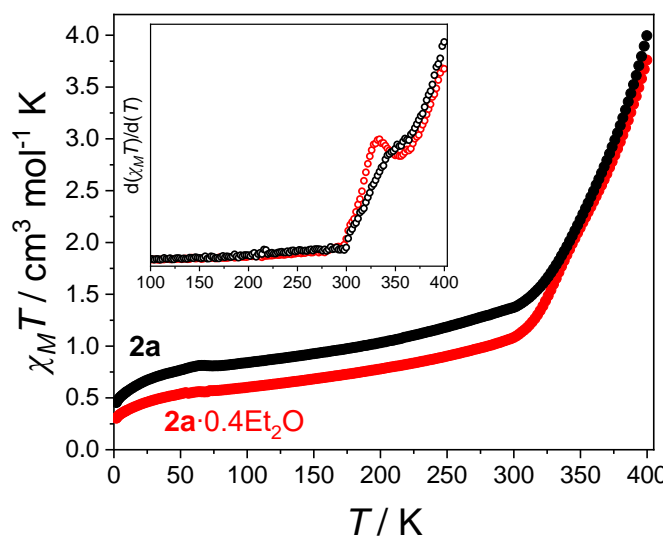

**Fig S10** Plots of  $\chi_M T$  vs  $T$  for **2a**·0.4Et<sub>2</sub>O (red) and **2a** (black) on heating 1.8 – 400 K. Inset: first derivative plot  $d(\chi_M T)/d(T)$  for **2a**·0.4Et<sub>2</sub>O (red) **2a** (black) highlighting the two-step VT behavior and the plateau temperature.

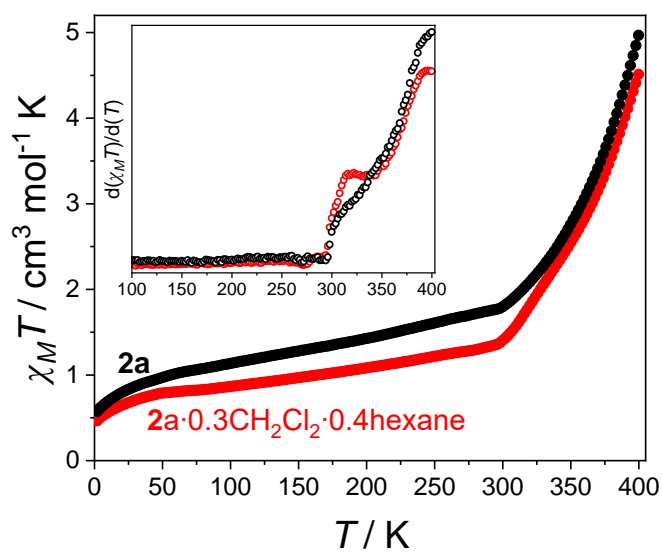

**Fig S11** Plots of  $\chi_M T$  vs  $T$  for **2a**·0.3CH<sub>2</sub>Cl<sub>2</sub>·0.4hexane (red) and **2a** (black) on heating 1.8 – 400 K. Inset: first derivative plot  $d(\chi_M T)/d(T)$  for **2a**·0.3CH<sub>2</sub>Cl<sub>2</sub>·0.4hexane (red) **2a** (black) highlighting the two-step VT behavior and the plateau temperature.

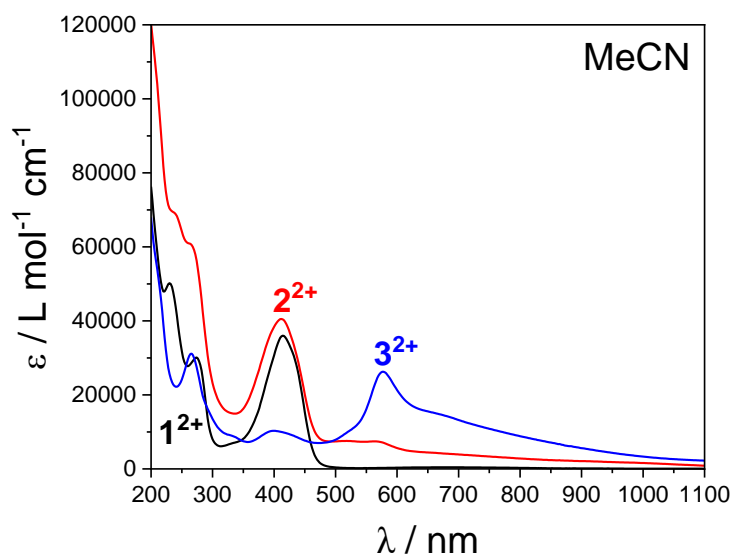

**Fig S12** UV-Vis-NIR absorption spectra for MeCN solutions of  $1^{2+}$  (black),  $2^{2+}$  (red), and  $3^{2+}$  (blue) at 298 K.

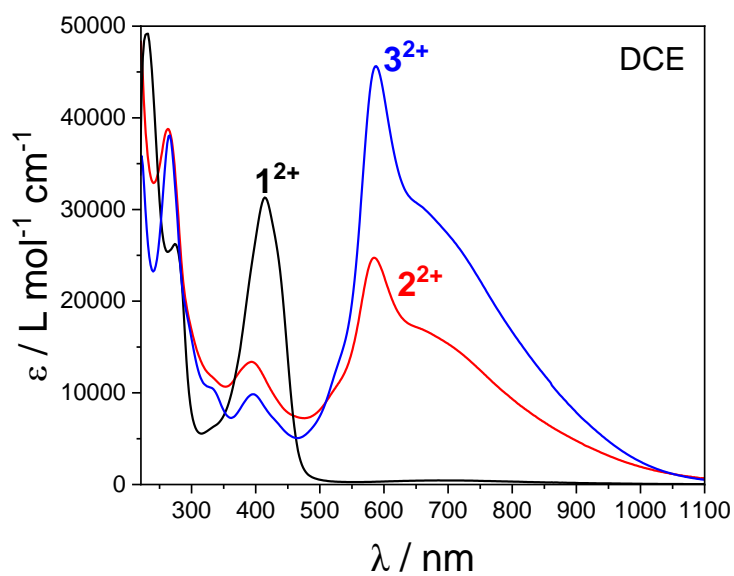

**Fig S13** UV-Vis-NIR absorption spectra for DCE solutions of  $1^{2+}$  (black),  $2^{2+}$  (red), and  $3^{2+}$  (blue) at 298 K.

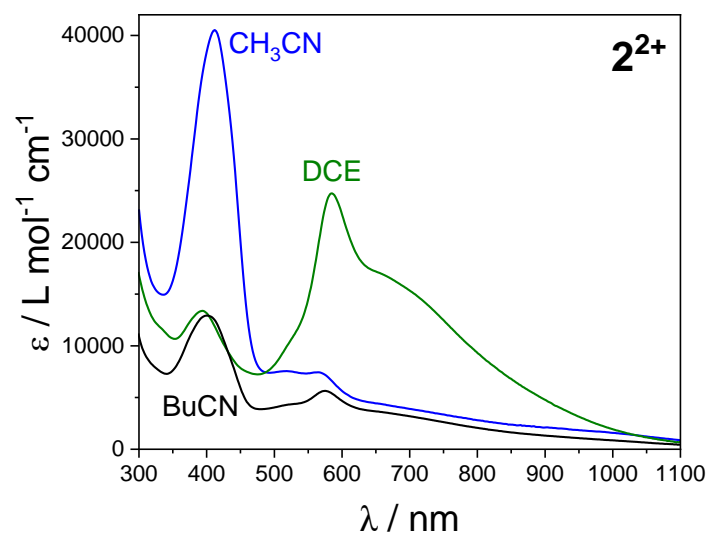

**Fig S14** UV-Vis-NIR absorption spectra for MeCN (blue) and DCE (green) solutions of  $2^{2+}$  at 298

K.

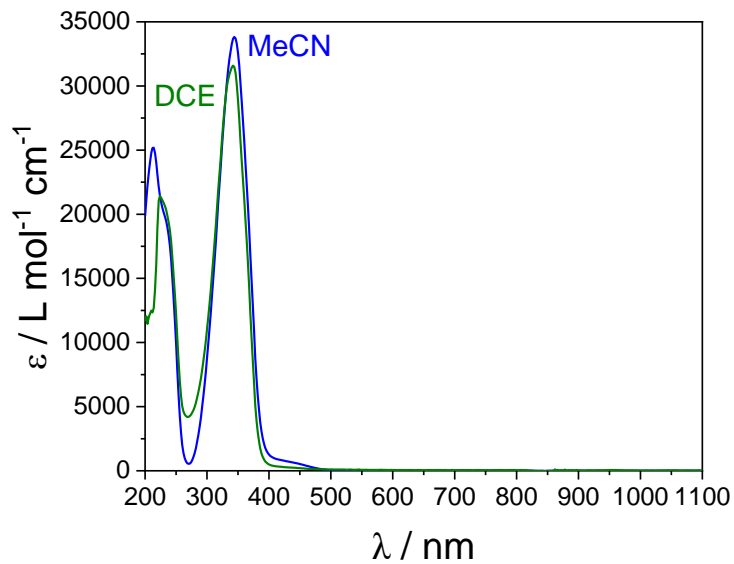

**Fig S15** UV-Vis-NIR absorption spectra for MeCN (blue) and DCE (green) solutions of thMH<sub>4</sub> at

298 K.

**Table S3** Electronic absorption bands for acetonitrile solutions of compounds **1<sup>2+</sup>**, **2<sup>2+</sup>** and **3<sup>2+</sup>**.

| Band assignment                 | $\lambda$ / nm ( $\epsilon$ / L mol <sup>-1</sup> cm <sup>-1</sup> ) |
|---------------------------------|----------------------------------------------------------------------|
| <b>1<sup>2+</sup></b>           |                                                                      |
| $\pi - \pi^*$ cat <sup>2-</sup> | 232 (49937)                                                          |
| $\pi - \pi^*$                   | 276 (29845)                                                          |
| LC cat <sup>2-</sup>            | 418 (35607)                                                          |
| LMCT                            | 684 (438)                                                            |
| <b>2<sup>2+</sup></b>           |                                                                      |
| $\pi - \pi^*$ cat <sup>2-</sup> | 242 (68294)                                                          |
| $\pi - \pi^*$                   | 266 (60808)                                                          |
| LC cat <sup>2-</sup>            | 418 (39717)                                                          |
| LC SQ <sup>•-</sup>             | 522 (7532)                                                           |
| LC SQ <sup>•-</sup>             | 570 (9325)                                                           |
| LMCT                            | 694 (4874)                                                           |
| <b>3<sup>2+</sup></b>           |                                                                      |
| $\pi - \pi^*$                   | 264 (31134)                                                          |
| MLCT                            | 406 (10192)                                                          |
| LC SQ <sup>•-</sup>             | 580 (26122)                                                          |
| MLCT                            | 704 (13011)                                                          |

---

LC = ligand centered, LMCT = ligand to metal charge transfer, MLCT = metal to ligand charge transfer

---

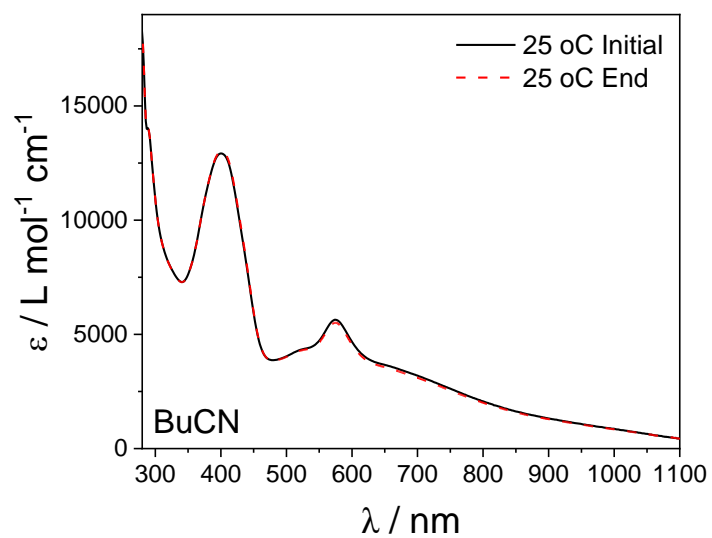

**Fig S16** UV-Vis sample of  $2^{2+}$  BuCN at 298 K measured immediately following dissolution (black solid line) and after heating from 268 to 323 K.

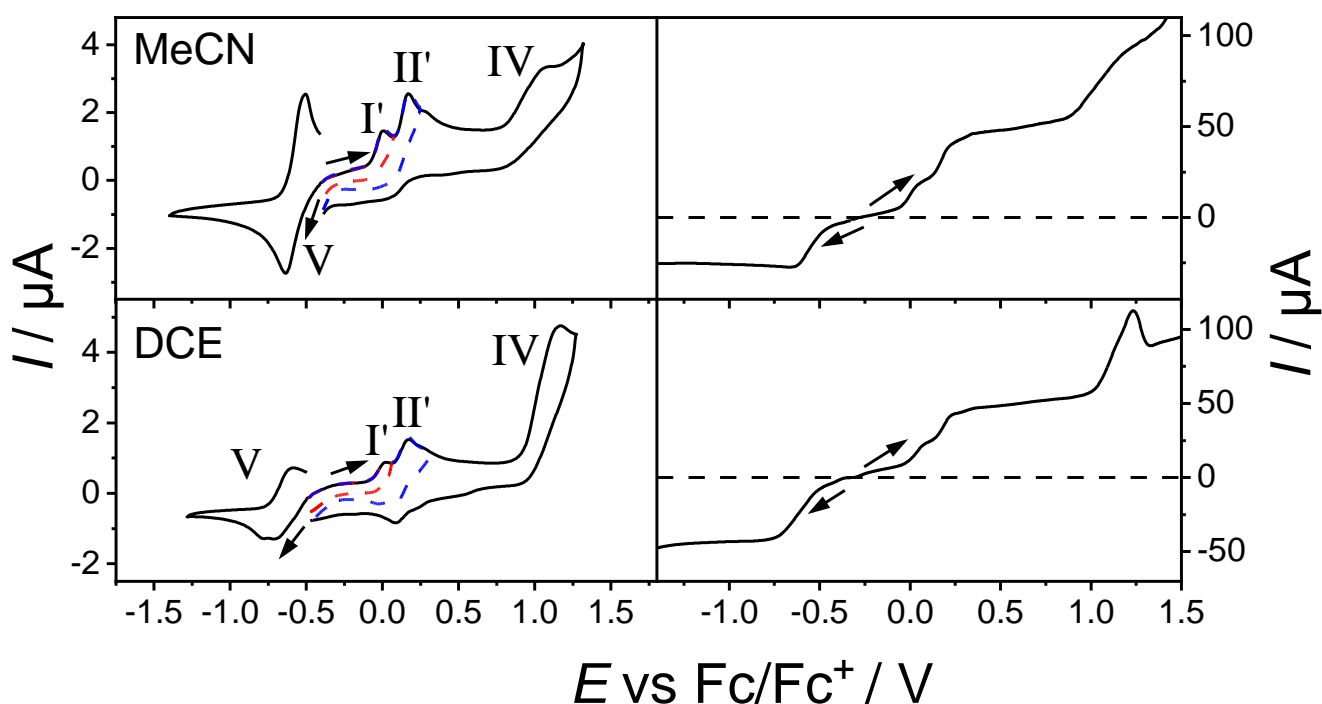

**Fig S17** Cyclic voltammograms of MeCN or dichloroethane (DCE) solutions of compound  $2^{2+}$  (1.0 mM with 0.25 M  $\text{Bu}_4\text{NPF}_6$ ) at a scan rate of  $100 \text{ mV s}^{-1}$  (left). Corresponding Rotating disc electrode voltammogram at a scan rate of  $50 \text{ mV s}^{-1}$  and a rotation rate of  $500 \text{ rotations min}^{-1}$ . Arrows indicate the starting potential and direction of the scan.

**Table S4** Cyclic voltammetry and rotating disk electrode voltammetry data for compounds  $2^{2+}$  acetonitrile or 1,2-dichloroethane<sup>a</sup>

|                 | Cyclic Voltammetry $E_m$ or $E_p$ / V ( $\Delta E_p$ / mV) |                    |     |                    |        | Rotating Disk Electrode Voltammetry $E_{1/2}$ / V ( $i_L$ / $\mu\text{A}$ ) |          |        |         |        |
|-----------------|------------------------------------------------------------|--------------------|-----|--------------------|--------|-----------------------------------------------------------------------------|----------|--------|---------|--------|
|                 | I / I'                                                     | II / II'           | III | IV                 | V      | I / I'                                                                      | II / II' | III    | IV      | V      |
| $2^{2+}$ (MeCN) | 0.008 <sup>b</sup>                                         | 0.155 <sup>b</sup> | -   | 1.093 <sup>b</sup> | -0.573 | 0.009                                                                       | 0.177    | -      | 1.099   | -0.528 |
|                 |                                                            |                    |     | (130)              | (20.9) | (42.6)                                                                      |          | (97.3) | (-27.2) |        |
| $2^{2+}$ (DCE)  | 0.002                                                      | 0.125              | -   | 1.175 <sup>b</sup> | -0.670 | 0.019                                                                       | 0.183    | -      | 1.127   | -0.595 |
|                 | (75)                                                       | (90)               |     | (160)              | (11.6) | (21.4)                                                                      |          | (56.1) | (-21.0) |        |

<sup>a</sup> 1.0 mM in MeCN or DCE, 0.25 M  $\text{Bu}_4\text{NPF}_6$ , scan rate  $100 \text{ mV s}^{-1}$ . Potentials reported vs  $\text{Fc}/\text{Fc}^+$  couple. <sup>b</sup>  $E_p$  rather than  $E_m$



**Table S5** Cyclic voltammetry and rotating disk electrode voltammetry data for compounds **1a**, **2a** and **3a** and literature  $[\{\text{Co}(\text{Me}_n\text{tpa})\}_2(\text{spiro})]^{2+}$  and  $[\{\text{Co}(\text{Me}_n\text{tpa})\}_2(\text{Br}_4\text{spiro})]^{2+}$  complexes ( $n = 0, 2, 3$ )<sup>1,2</sup> in acetonitrile.<sup>a</sup>

|                                                                                    | Cyclic Voltammetry $E_m$ or $E_p$ / V ( $\Delta E_p$ / mV) |                   |                   |                   |                    | Rotating Disk Electrode Voltammetry $E_{1/2}$ / V ( $i_L$ / $\mu\text{A}$ ) |          |       |      |       |
|------------------------------------------------------------------------------------|------------------------------------------------------------|-------------------|-------------------|-------------------|--------------------|-----------------------------------------------------------------------------|----------|-------|------|-------|
|                                                                                    | I / I'                                                     | II / II'          | III               | IV                | V                  | I / I'                                                                      | II / II' | III   | IV   | V     |
| <b>1a</b>                                                                          | 0.070                                                      | 0.17              | -                 | 0.98              | -1.27 <sup>b</sup> | 0.08                                                                        | 0.22     | -     | 1.02 | -1.23 |
| <b>2a</b>                                                                          | 0.01 <sup>b</sup>                                          | 0.16 <sup>b</sup> | -                 | 1.09 <sup>b</sup> | -0.57              | 0.01                                                                        | 0.18     | -     | 1.10 | -0.53 |
| <b>3a</b>                                                                          | -0.52                                                      | -0.66             | 0.25 <sup>b</sup> | -                 | -                  | -0.49                                                                       | -0.63    | 0.23  | -    | -     |
| $[\{\text{Co}(\text{tpa})\}_2(\text{spiro})](\text{ClO}_4)_2$                      | -0.15                                                      | -0.01             | -                 | 0.86              | -1.11              | -0.14                                                                       | 0.03     | -     | -    | -     |
| $[\{\text{Co}(\text{Me}_2\text{tpa})\}_2(\text{spiro})](\text{ClO}_4)_2$           | -0.85                                                      | -0.71             | 0.00 <sup>b</sup> | 0.98 <sup>b</sup> | -                  | -                                                                           | -        | -0.02 | -    | -     |
| $[\{\text{Co}(\text{Me}_2\text{tpa})\}_2(\text{spiro})](\text{PF}_6)_2$            | -0.86                                                      | -0.74             | -0.08             | 1.14 <sup>b</sup> | -                  | -0.88                                                                       | -0.71    | -0.01 | -    | -     |
| $[\{\text{Co}(\text{Me}_3\text{tpa})\}_2(\text{spiro})](\text{ClO}_4)_2$           | -0.86                                                      | -0.69             | 0.14 <sup>b</sup> | -                 | -                  | -0.87                                                                       | -0.68    | 0.17  | -    | -     |
| $[\{\text{Co}(\text{tpa})\}_2(\text{Br}_4\text{spiro})](\text{PF}_6)_2$            | 0.17                                                       | 0.30              | -                 | 1.09 <sup>b</sup> | -0.993             | 0.18                                                                        | 0.33     | -     | 1.10 | -1.12 |
| $[\{\text{Co}(\text{Me}_2\text{tpa})\}_2(\text{Br}_4\text{spiro})](\text{PF}_6)_2$ | 0.15 <sup>b</sup>                                          | 0.31 <sup>b</sup> | -                 | 1.16 <sup>b</sup> | -0.640             | 0.07                                                                        | 0.25     | -     | 1.00 | -0.66 |
| $[\{\text{Co}(\text{Me}_3\text{tpa})\}_2(\text{Br}_4\text{spiro})](\text{PF}_6)_2$ | -0.58                                                      | -0.42             | 0.29 <sup>b</sup> | 1.21              | -                  | -0.61                                                                       | -0.43    | 0.24  | -    | -     |

<sup>a</sup> 1.0 mM in MeCN, 0.25 M  $\text{Bu}_4\text{NPF}_6$  or 0.1 M  $\text{Bu}_4\text{NPF}_6$ , scan rate 100  $\text{mV s}^{-1}$ . Potentials reported vs Fc/Fc<sup>+</sup> couple. <sup>b</sup>  $E_p$  rather than  $E_m$

**Table S6** Separation of electrochemical processes for **1<sup>2+</sup>**, **2<sup>2+</sup>** and **3<sup>2+</sup>** in MeCN.<sup>a</sup>

|                       | $\Delta diox$ / mV      | $\Delta ox-red$ / mV                 |
|-----------------------|-------------------------|--------------------------------------|
| <b>1<sup>2+</sup></b> | 100                     | 1340 <sup>b</sup>                    |
| <b>2<sup>2+</sup></b> | 150 (125 <sup>c</sup> ) | 580 <sup>b</sup> (670 <sup>c</sup> ) |
| <b>3<sup>2+</sup></b> | 140                     | 770 <sup>b</sup>                     |

<sup>a</sup> Calculated from CV potentials. Values reported to nearest 5 mV. <sup>b</sup>  $E_p$  used in calculations instead of  $E_m$  as potentials are irreversible. <sup>c</sup> DCE data

**Table S7** Spin states ( $S$ ), total energies without ( $E$ ) and with ( $E^{ZPE}$ ) zero-point harmonic vibrations, total enthalpies ( $H^{298}$ ) and expectation values of the spin-squared operator ( $\hat{S}^2$ ) of compounds **1a**, **2a** and **3a** as calculated by the DFT UTPSSh/6-311++G(d,p) method.

|           | Charge Distribution                             | $S$ | $E$ (a.u.)   | $E^{ZPE}$ (a.u.) | $H^{298}$ (a.u.) | $\hat{S}^2$ |
|-----------|-------------------------------------------------|-----|--------------|------------------|------------------|-------------|
| <b>1a</b> | {Co <sup>III</sup> -cat-cat-Co <sup>III</sup> } | 0   | -7657.506788 | -7656.538218     | -7656.461501     | 0.000       |
|           | {Co <sup>III</sup> -cat-SQ-Co <sup>II</sup> }   | 2   | -7657.491125 | -7656.526360     | -7656.447651     | 6.026       |
|           | $\beta\alpha^a$                                 | 1   | -7657.488634 | –                | –                | 3.011       |
|           | {Co <sup>II</sup> -SQ-SQ-Co <sup>II</sup> }     | 4   | -7657.468208 | -7656.507571     | -7656.428603     | 20.032      |
|           | $\alpha\beta\beta\alpha^a$                      | 2   | -7657.463563 | –                | –                | 8.001       |
|           | $\alpha\alpha\beta\beta^a$                      | 0   | -7657.472389 | –                | –                | 3.806       |
|           | $\alpha\beta\alpha\beta^a$                      | 0   | -7657.467667 | –                | –                | 3.821       |
|           | $\alpha\beta\alpha\alpha^a$                     | 3   | -7657.470788 | –                | –                | 12.723      |
|           | $\beta\alpha\alpha\alpha^a$                     | 1   | -7657.466049 | –                | –                | 5.017       |
| <b>2a</b> | {Co <sup>III</sup> -cat-cat-Co <sup>III</sup> } | 0   | -7814.802502 | -7813.724748     | -7813.641633     | 0.000       |
|           | {Co <sup>III</sup> -cat-SQ-Co <sup>II</sup> }   | 2   | -7814.798017 | -7813.724225     | -7813.639279     | 6.024       |
|           | $\beta\alpha^a$                                 | 1   | -7814.796056 | –                | –                | 3.017       |
|           | {Co <sup>II</sup> -SQ-SQ-Co <sup>II</sup> }     | 4   | -7814.788077 | -7813.718246     | -7813.630326     | 20.031      |
|           | $\alpha\beta\beta\alpha^a$                      | 2   | -7814.783714 | –                | –                | 7.954       |
|           | $\alpha\alpha\beta\beta^a$                      | 0   | -7814.792190 | –                | –                | 3.816       |
|           | $\alpha\beta\alpha\beta^a$                      | 0   | -7814.788288 | –                | –                | 3.618       |
|           | $\alpha\beta\alpha\alpha^a$                     | 3   | -7814.790172 | –                | –                | 12.738      |
|           | $\beta\alpha\alpha\alpha^a$                     | 1   | -7814.785386 | –                | –                | 5.024       |
| <b>3a</b> | {Co <sup>III</sup> -cat-cat-Co <sup>III</sup> } | 0   | -7893.447036 | -7892.313895     | -7892.226750     | 0.000       |
|           | {Co <sup>III</sup> -cat-SQ-Co <sup>II</sup> }   | 2   | -7893.452838 | -7892.323799     | -7892.234719     | 6.024       |
|           | $\beta\alpha^a$                                 | 1   | -7893.451159 | –                | –                | 3.021       |
|           | {Co <sup>II</sup> -SQ-SQ-Co <sup>II</sup> }     | 4   | -7893.449544 | -7892.324574     | -7892.235331     | 20.029      |
|           | $\alpha\beta\beta\alpha^a$                      | 2   | -7893.445821 | –                | –                | 8.023       |
|           | $\alpha\alpha\beta\beta^a$                      | 0   | -7893.453678 | –                | –                | 3.809       |
|           | $\alpha\beta\alpha\beta^a$                      | 0   | -7893.450069 | –                | –                | 3.619       |
|           | $\alpha\beta\alpha\alpha^a$                     | 3   | -7893.451691 | –                | –                | 12.736      |
|           | $\beta\alpha\alpha\alpha^a$                     | 1   | -7893.446888 | –                | –                | 5.026       |

<sup>a</sup>  $\alpha$  corresponds to spin-up,  $\beta$  corresponds to spin-down; the order of the paramagnetic centers in {Co<sup>II</sup>-SQ-SQ-Co<sup>II</sup>}: (1) Co<sup>II</sup> (2) SQ (3) SQ (4) Co<sup>II</sup>

**Table S8** Spin states ( $S$ ), relative energies ( $\Delta E$ ), relative energies with zero-point harmonic vibrations ( $\Delta E^{ZPE}$ ), relative enthalpies ( $\Delta H^{298}$ ) (all values are given in kcal mol<sup>-1</sup>) and the amount of spin density at the metal centres ( $q_s^{Co1}$ ,  $q_s^{Co2}$ ) of compounds **1a**, **2a** and **3a** as calculated by the DFT UTPSSh/6-311++G(d,p) method.

|           | Charge Distribution                             | $S$ | $\Delta E$ | $\Delta E^{ZPE}$ | $\Delta H^{298}$ | $q_s^{Co1}$ | $q_s^{Co2}$ |
|-----------|-------------------------------------------------|-----|------------|------------------|------------------|-------------|-------------|
| <b>1a</b> | {Co <sup>III</sup> -cat-cat-Co <sup>III</sup> } | 0   | 0.0        | 0.0              | 0.0              | 0.00        | 0.00        |
|           | {Co <sup>III</sup> -cat-SQ-Co <sup>II</sup> }   | 2   | 9.8        | 7.4              | 8.7              | 0.00        | 2.47        |
|           | {Co <sup>II</sup> -SQ-SQ-Co <sup>II</sup> }     | 4   | 24.2       | 19.2             | 20.6             | 2.47        | 2.47        |
| <b>2a</b> | {Co <sup>III</sup> -cat-cat-Co <sup>III</sup> } | 0   | 0.0        | 0.0              | 0.0              | 0.00        | 0.00        |
|           | {Co <sup>III</sup> -cat-SQ-Co <sup>II</sup> }   | 2   | 2.8        | 0.3              | 1.5              | 0.00        | 2.56        |
|           | {Co <sup>II</sup> -SQ-SQ-Co <sup>II</sup> }     | 4   | 9.1        | 4.1              | 7.1              | 2.57        | 2.57        |
| <b>3a</b> | {Co <sup>III</sup> -cat-cat-Co <sup>III</sup> } | 0   | 3.6        | 6.7              | 5.4              | 0.00        | 0.00        |
|           | {Co <sup>III</sup> -cat-SQ-Co <sup>II</sup> }   | 2   | 0.0        | 0.5              | 0.4              | 0.00        | 2.58        |
|           | {Co <sup>II</sup> -SQ-SQ-Co <sup>II</sup> }     | 4   | 2.1        | 0.0              | 0.0              | 2.59        | 2.59        |

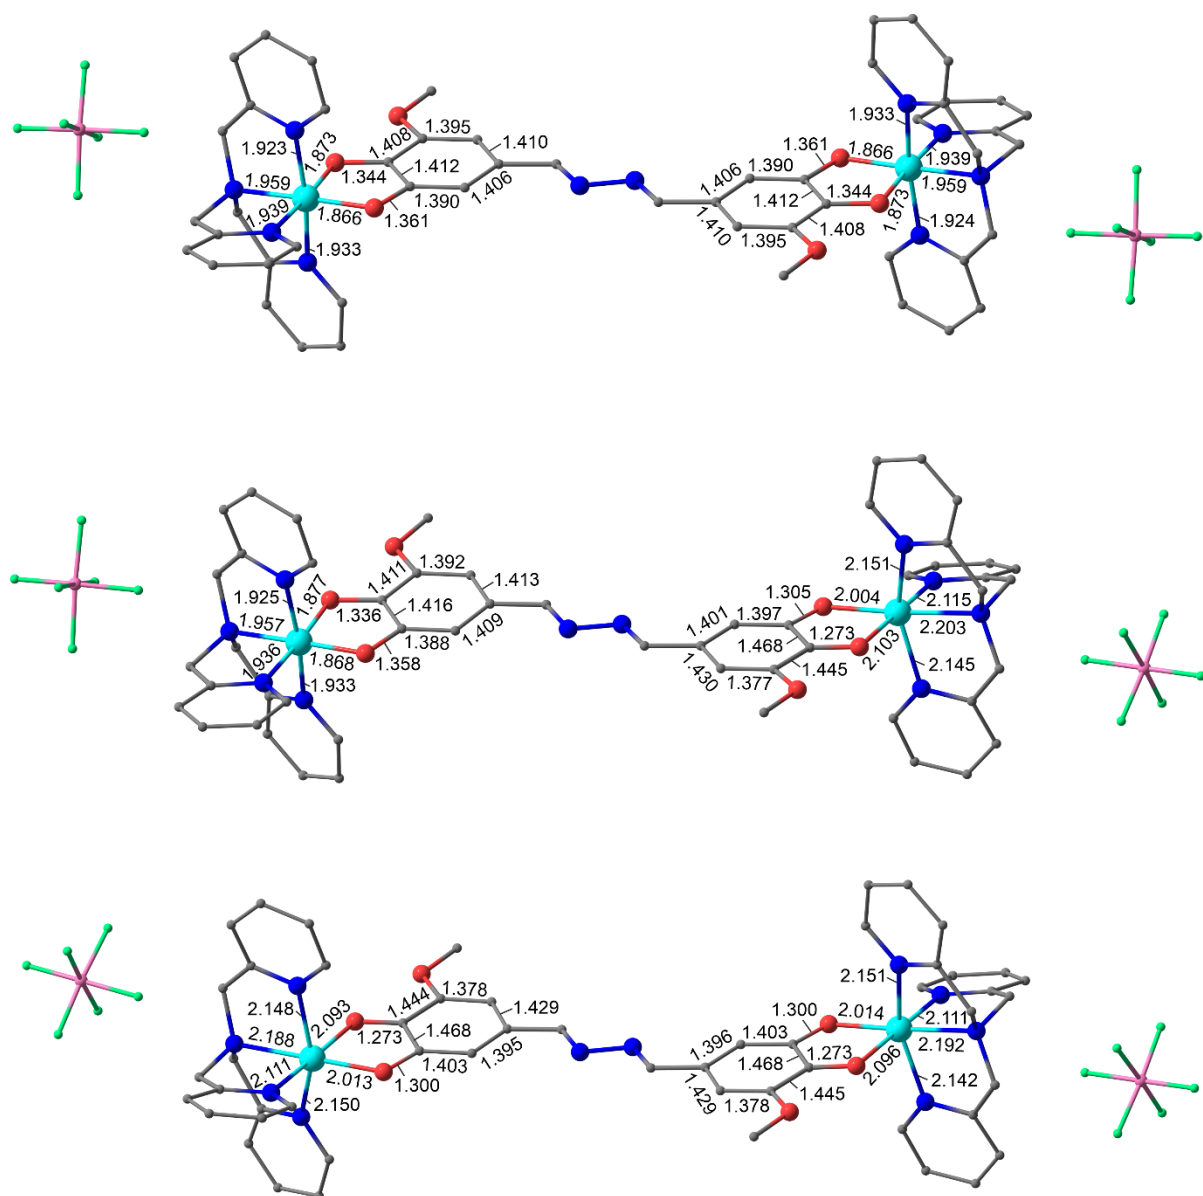

**Fig S18** Optimized geometries of **1a** in the three charge distributions,  $\{Co^{III}\text{-cat-cat-Co}^{III}\}$  (top),  $\{Co^{III}\text{-cat-SQ-Co}^{II}\}$  (middle) and  $\{Co^{II}\text{-SQ-SQ-Co}^{II}\}$  (bottom) as calculated by the DFT UTPSSh/6-311++G(d,p) method. Hydrogen atoms are omitted; bond lengths are given in Å.

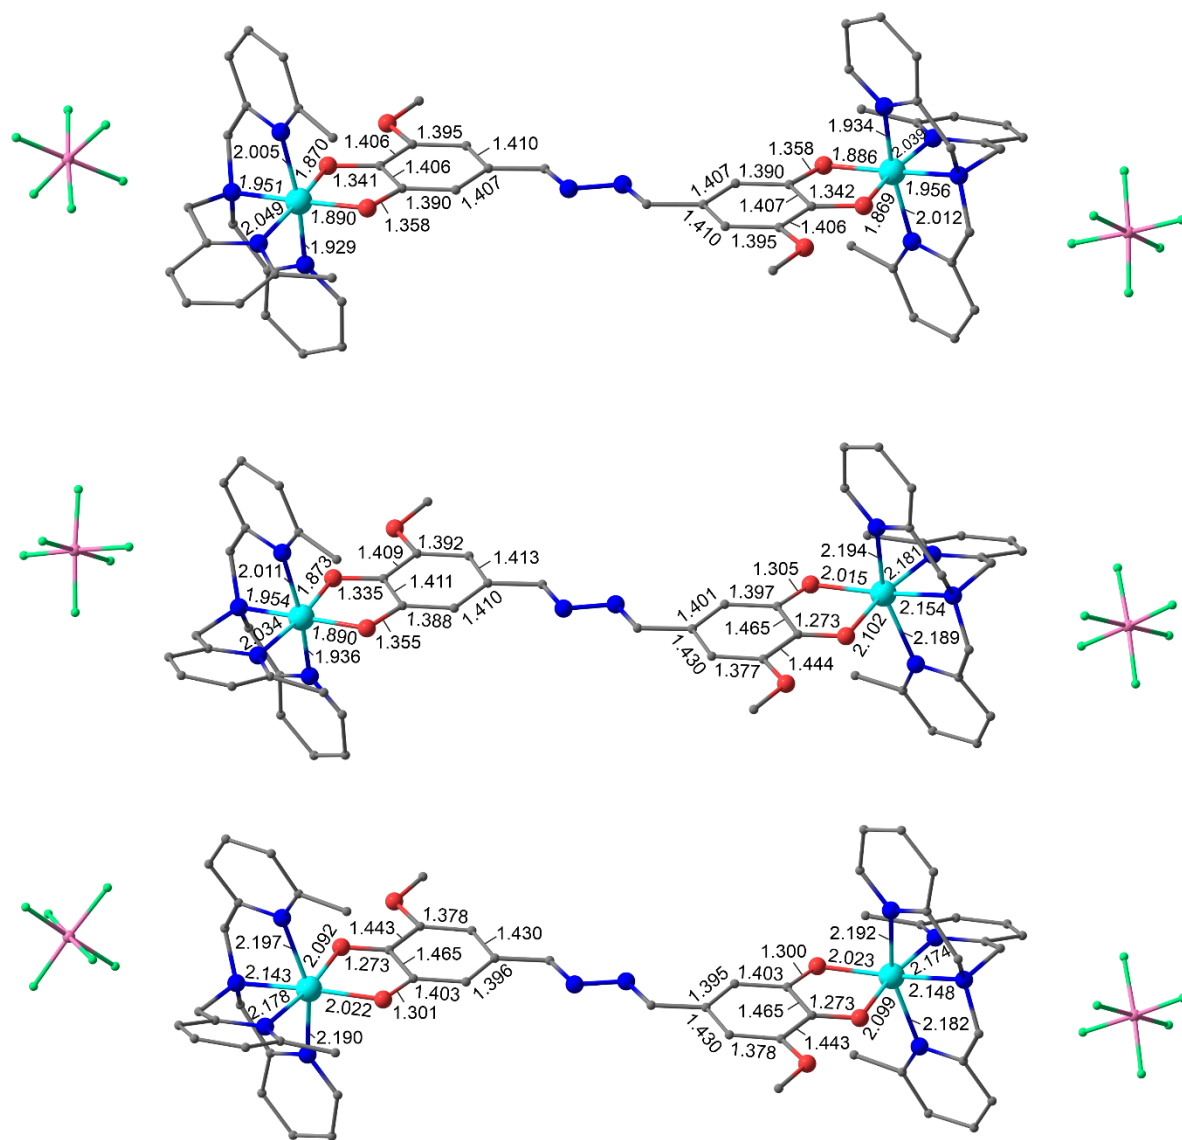

**Fig S19** Optimized geometries of **2a** in the three charge distributions,  $\{\text{Co}^{\text{III}}\text{-cat-cat-Co}^{\text{III}}\}$  (top),  $\{\text{Co}^{\text{III}}\text{-cat-SQ-Co}^{\text{II}}\}$  (middle) and  $\{\text{Co}^{\text{II}}\text{-SQ-SQ-Co}^{\text{II}}\}$  (bottom) as calculated by the DFT UTPSSh/6-311++G(d,p) method. Hydrogen atoms are omitted; bond lengths are given in Å.

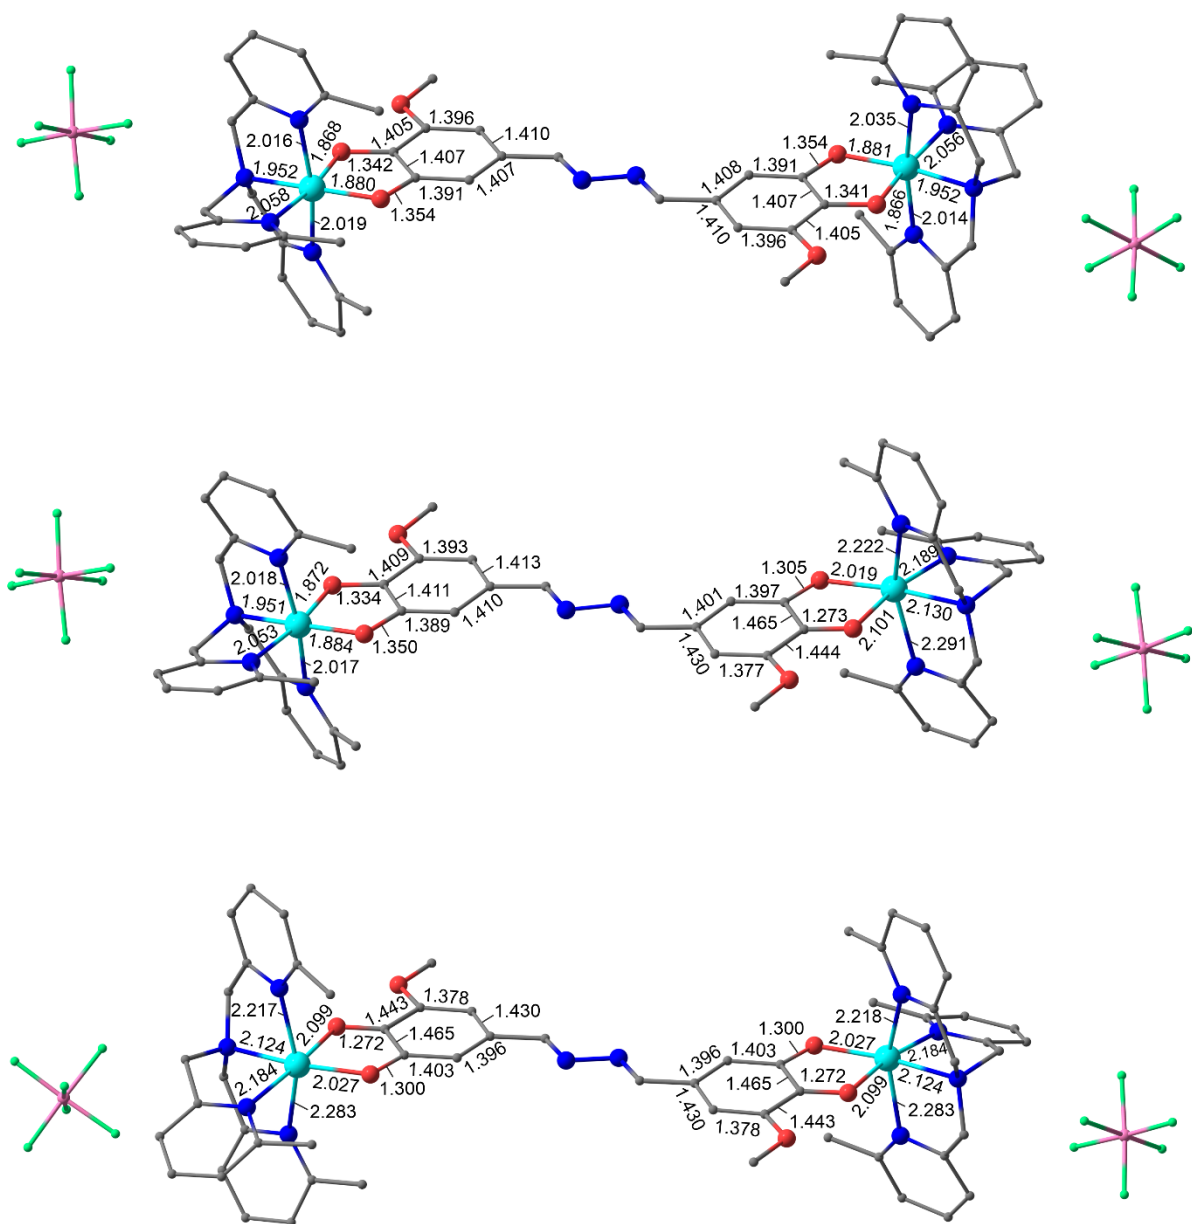

**Fig S20** Optimized geometries of **3a** in the three charge distributions, {Co<sup>III</sup>-cat-cat-Co<sup>III</sup>} (top), {Co<sup>III</sup>-cat-SQ-Co<sup>II</sup>} (middle) and {Co<sup>II</sup>-SQ-SQ-Co<sup>II</sup>} (bottom) as calculated by the DFT UTPSSh/6-311++G(d,p) method. Hydrogen atoms are omitted; bond lengths are given in Å.

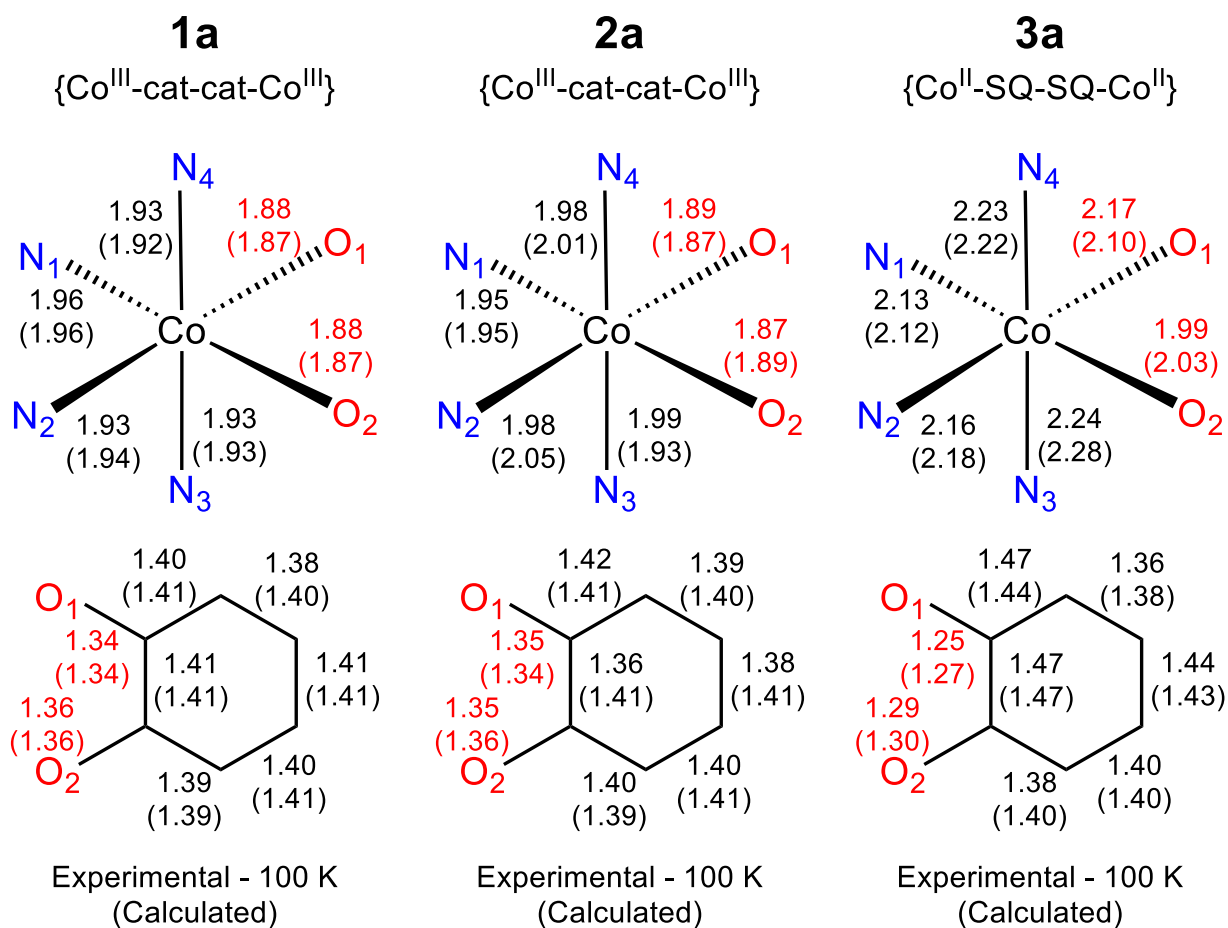

**Fig S21** Comparison of the experimental bond lengths at 100 K for **1a**·2toluene·2MeCN, **2a**·1.8CH<sub>2</sub>Cl<sub>2</sub>, and **3a**·2acetone with the gas phase calculated bond lengths for the {Co<sup>III</sup>-cat-cat-Co<sup>III</sup>} state for **1a** and **2a** and {Co<sup>II</sup>-SQ-SQ-Co<sup>II</sup>} for **3a**. Experimental values listed above and calculated values listed below in brackets.

**Table S9** Exchange coupling parameters ( $\text{cm}^{-1}$ ) as calculated by the DFT UTPSSh/6-311++G(d,p) method.

| Charge Distribution                           | Coupled moieties <sup>a</sup>      | 1a   | 2a   | 3a   |
|-----------------------------------------------|------------------------------------|------|------|------|
| {Co <sup>III</sup> -cat-SQ-Co <sup>II</sup> } | Co <sup>II</sup> -SQ1              | 181  | 143  | 123  |
|                                               | Co <sup>II</sup> -SQ1              | 171  | 148  | 132  |
| {Co <sup>II</sup> -SQ-SQ-Co <sup>II</sup> }   | Co <sup>II</sup> -SQ2              | -1   | 9    | 2    |
|                                               | SQ1-SQ2                            | -781 | -782 | -758 |
|                                               | Co <sup>II</sup> -Co <sup>II</sup> | 7    | 5    | 7    |

<sup>a</sup>SQ1 represents the coordinated dioxolene and SQ2 represents the non-coordinated dioxolene.

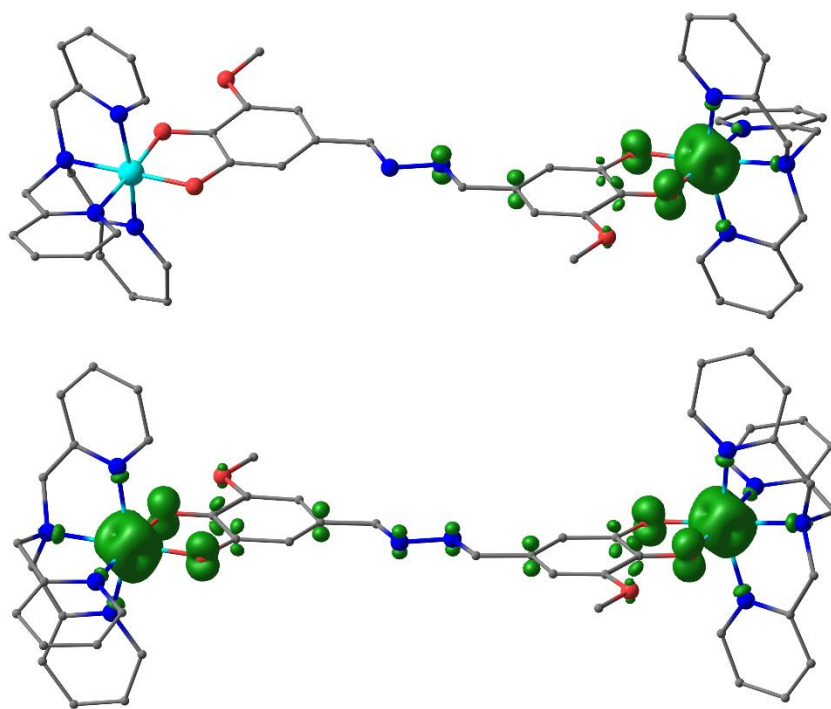

**Fig S22** Spin density distribution (contour value =  $0.015 \text{ e } \text{\AA}^{-3}$ ) of the **1a** in the two charge distributions, {Co<sup>III</sup>-cat-SQ-Co<sup>II</sup>} (top) and {Co<sup>II</sup>-SQ-SQ-Co<sup>II</sup>} (bottom) as calculated by the DFT UTPSSh/6-311++G(d,p) method. Hydrogen atoms and  $\text{PF}_6^-$  anions are omitted.



## References

- 1 G. K. Gransbury, B. N. Livesay, J. T. Janetzki, M. A. Hay, R. W. Gable, M. P. Shores, A. Starikova and C. Boskovic, *J. Am. Chem. Soc.*, 2020, **142**, 10692–10704.
- 2 K. G. Alley, G. Poneti, P. S. D. Robinson, A. Nafady, B. Moubaraki, J. B. Aitken, S. C. Drew, C. Ritchie, B. F. Abrahams, R. K. Hocking, K. S. Murray, A. M Bond, H. H. Harris, L. Sorace and C. Boskovic, *J. Am. Chem. Soc.*, 2013, **135**, 8304–8323.
